# Supplementary material for: Synthesis, X-ray crystal structures, optical properties and modelling data of neutral bis(1,2-dithiolene) nickel complexes of the “non-cyclic SR” family
Source: Royal Society of Chemistry journal article supplement (doi:10.1039/c2nj40398f), 2012-01-01
Supplement: c2nj40398f.pdf [file c2nj40398f.pdf]

Supporting Information for

## Synthesis, X-Ray crystal structures, optical properties and modelling data of neutral bis(1,2-dithiolene) nickel complexes

Thanh-Tuan Bui<sup>a</sup>, Minh Ha Vuong<sup>a</sup>, Bénédicte Garreau-de Bonneval<sup>a</sup>, Fabienne Alary<sup>b</sup>, Jacob Kane<sup>a</sup>, Carine Duhayon<sup>a</sup>, Alix Sournia-Saquet<sup>a</sup> and Kathleen I. Moineau-Chane-Ching<sup>a\*</sup>

Table of Contents:

|                                                                                                                |    |
|----------------------------------------------------------------------------------------------------------------|----|
| Figure SI-1: X-Ray Structure of <b>complex 1</b> : side view.                                                  | P2 |
| Figure SI-2: X-Ray Structure of <b>complex 3</b> : side view.                                                  | P2 |
| Figure SI-3: packing of <b>complex 3</b> in the crystal with expanded (blue) and hanging (red) short contacts. | P3 |
| Figure SI-4: Ground state frontier molecular orbital of complex 1.                                             | P4 |
| Figure SI-5: Representation of selected calculated Raman frequencies of the three complexes.                   | P5 |

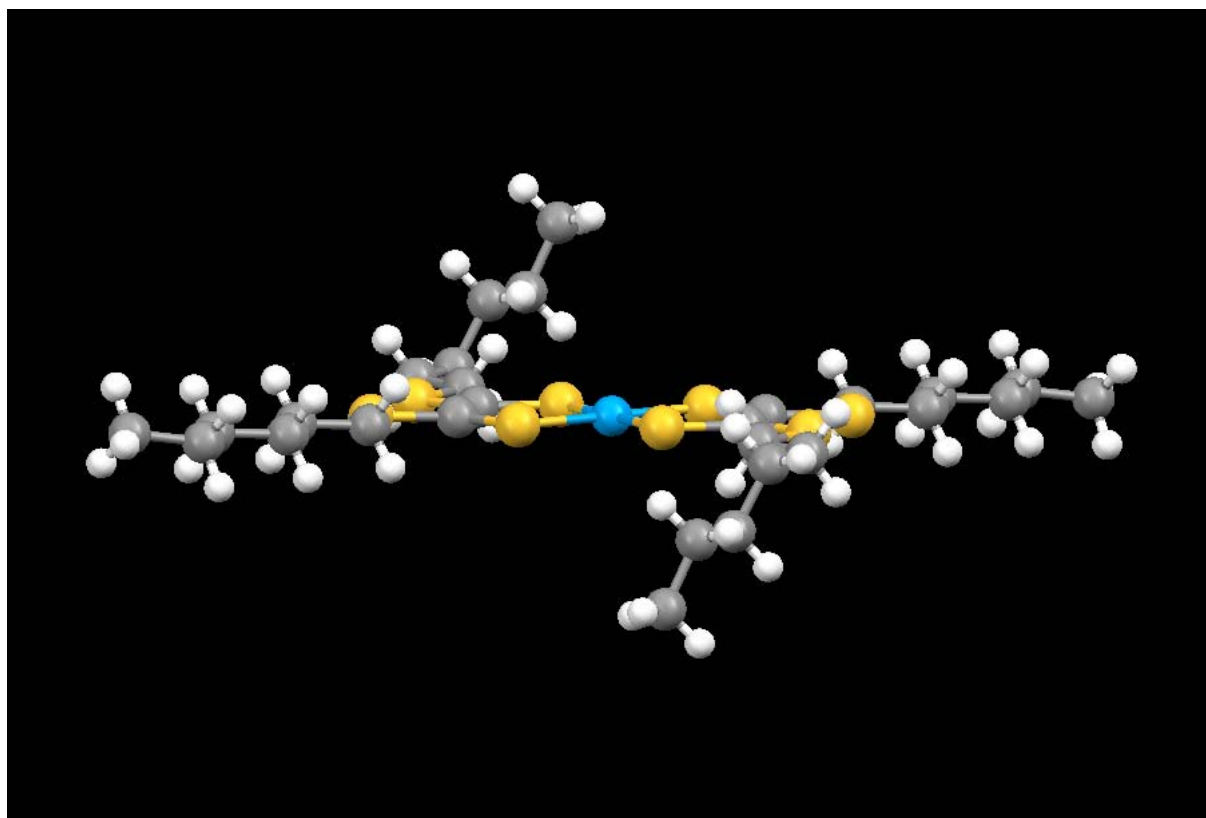

Figure SI-1 : X-Ray Structure of **complex 1**: side view.

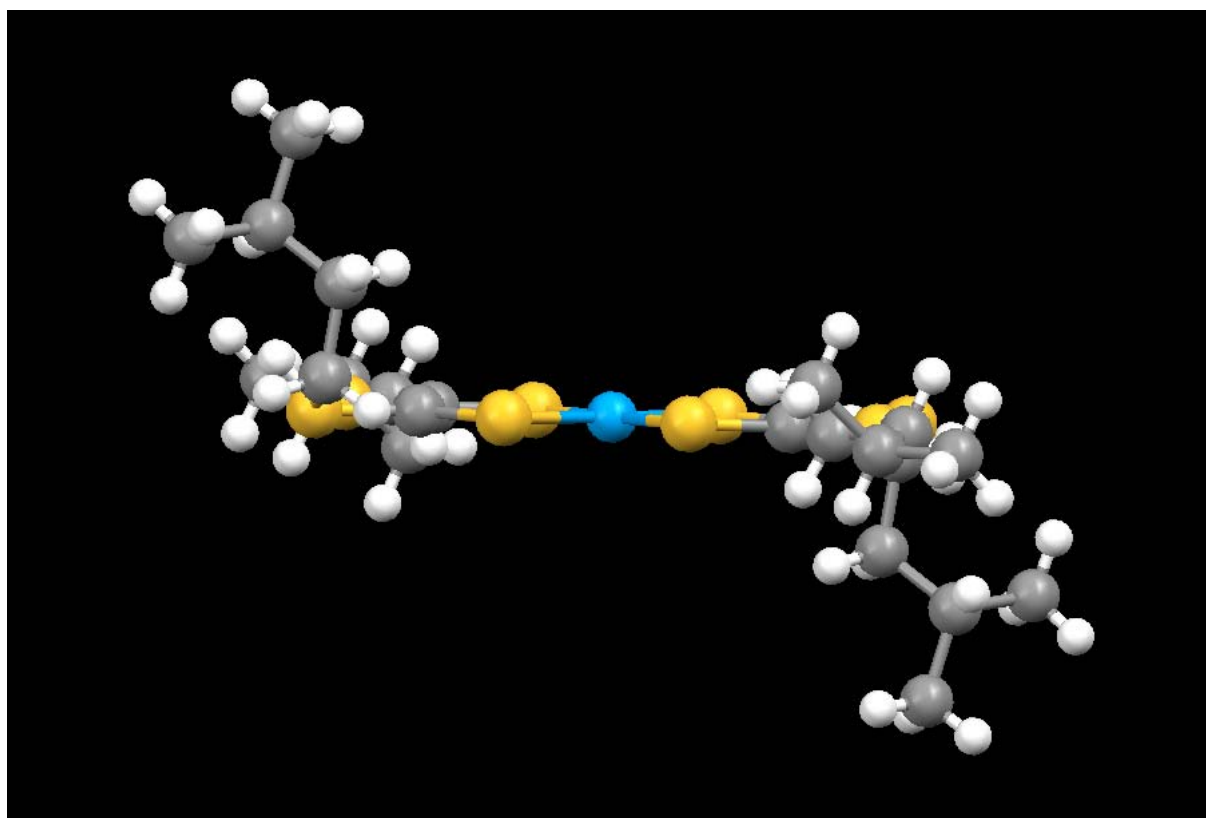

Figure SI-1 : X-Ray Structure of **complex 3**: side view.

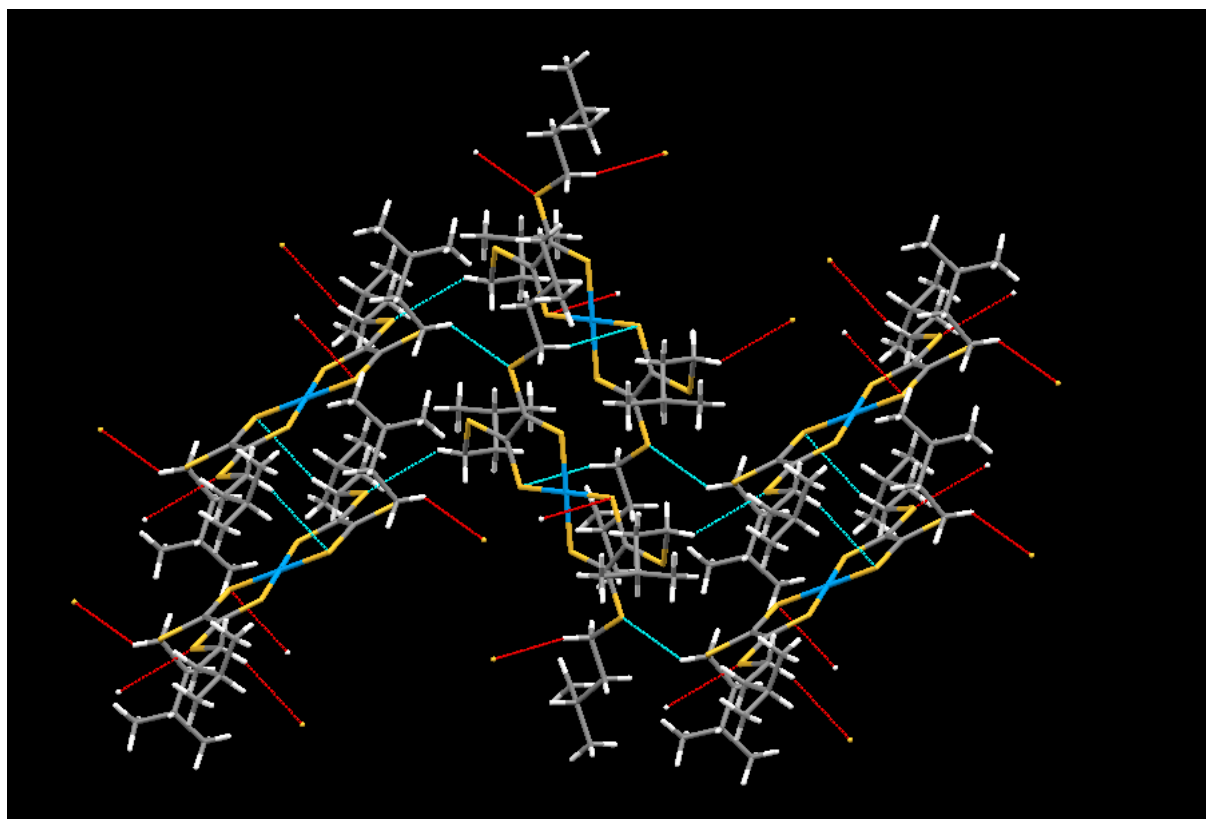

Figure SI-3 : packing of **complex 3** in the crystal with expanded (blue) and hanging (red) short contacts.

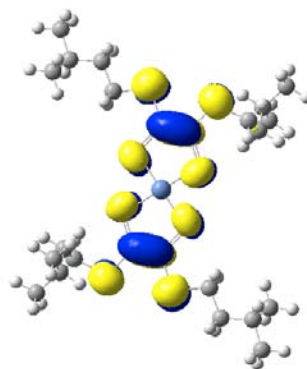

**HOMO**

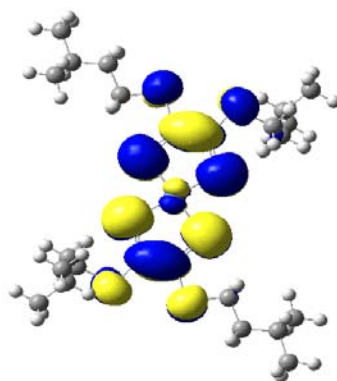

**LUMO**

Figure SI-4: HOMO and LUMO Orbitals of complex 3.

| <i>Assignment</i> | <i>Complex 1</i>                                                                    | <i>Complex 2</i> | <i>Complex 3</i>                                                                   |
|-------------------|-------------------------------------------------------------------------------------|------------------|------------------------------------------------------------------------------------|
| $\bar{\nu}$ Ni–S  | 377                                                                                 | 375              | 376/382                                                                            |
|                   | 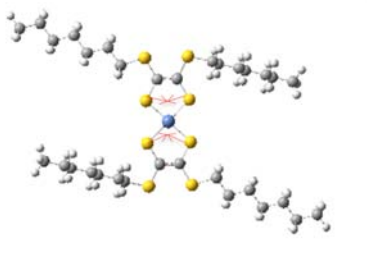   |                  |  |
| $\bar{\nu}$ C–S   | 983                                                                                 | 930              | 984                                                                                |
|                   |   |                  |                                                                                    |
| $\bar{\nu}$ C–C   | 1393                                                                                | 1416             | 1393                                                                               |
|                   |  |                  |                                                                                    |

Figure SI-5: Calculated Raman frequencies of the three complexes and schematic representation of the normal modes. For **complex 3**, the representation of the second band (if any) has been added in the last column.
